# Supplementary material for: Discrete bHLH transcription factors play functionally overlapping roles in pigmentation patterning in flowers of Antirrhinum majus
Source: PubMed Central journal article supplement (PMC8248400; doi:10.1111/nph.17142), 2021-01-12
Supplement: NPH-231-849-s001.pdf [file NPH-231-849-s001.pdf]

## **New Phytologist Supporting Information**

**Article title:** Discrete bHLH transcription factors play functionally overlapping roles in pigmentation patterning in flowers of *Antirrhinum majus*

**Authors:** Nick W. Albert, Eugenio Butelli, Sarah M. A. Moss, Paolo Piazza, Chethi N. Waite, Kathy E. Schwinn, Kevin M. Davies and Cathie Martin

**Article acceptance date:** 30 November 2020

### **Contents:**

**Supporting Figure S1: Differences in *mutabilis* phenotypes between greenhouse and field-grown plants of *A.majus***

**Supporting Figure S2 Lack of complementation between *inc I*<sup>1</sup> and *inc I*<sup>2</sup> of *A.majus***

**Supporting Figure S3: RNA gel blot showing lack of *Inc I* transcript in flower lobes of the *mutabilis* mutant of *A.majus***

**Supporting Figure S4 Sectors caused by excision of a transposable element (Tam 2) from the *Del* gene in *inc I*<sup>2</sup>: *del*<sup>rec</sup> plants of *A.majus***

**Supporting Figure S5 Phenotype of *del*<sup>23</sup> allele of *A.majus***

**Supporting Figure S6: Molecular analysis of *del*<sup>23</sup> of *A.majus***

**Supporting Figure S7: Impaired expression of anthocyanin biosynthetic genes in flowers of the *inc I*<sup>2</sup> mutant of *A.majus***

**Supporting Figure S8: Phenotypes of *pallida* mutants of *A.majus* with deletions in their UAS controlling *DFR* expression caused by imprecise transposon excision and described by Almeida *et al* (1989)**

**Supporting Dataset S1: Amino acid alignment of bHLH proteins**

**Supporting Table S1: Primers used in this study**

**Supporting references**

Supporting Figure S1: Differences in *mutabilis* phenotypes of *A. majus* between greenhouse and field-grown plants.

**Glass house grown**

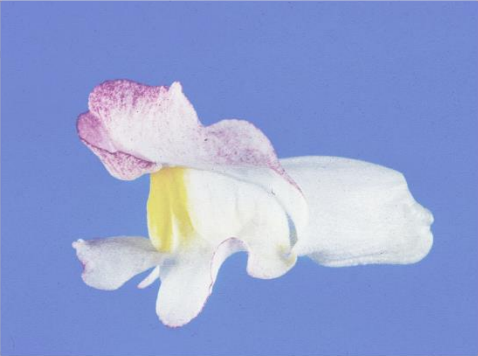

**Field grown**

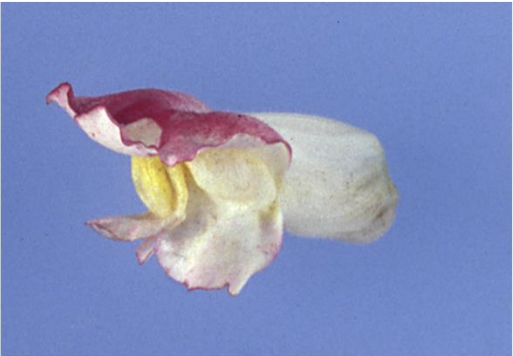

**Different phenotypes of *mutabilis* mutant in greenhouse and field-grown plants**

Arrow shows acyanic area of petal lobe shielded from the light by the other folds of the petal lobes in the flower buds

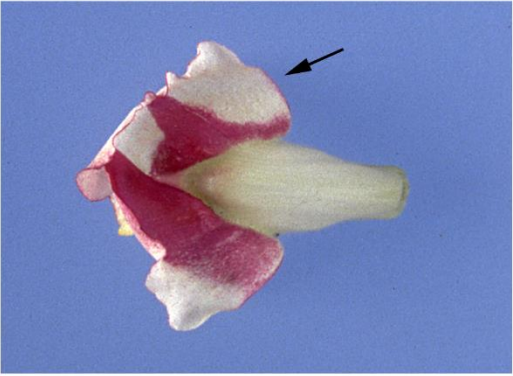

**Supporting Figure S2:**

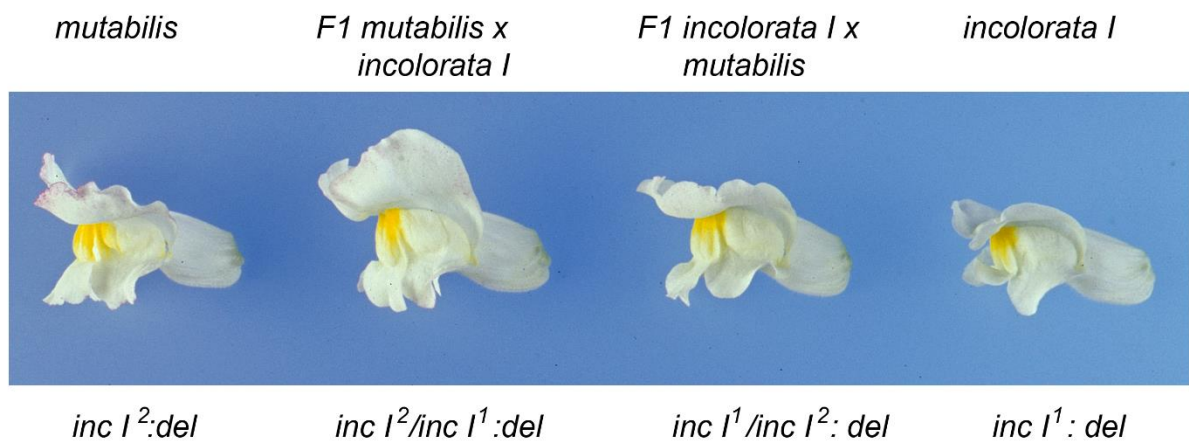

**Supporting Figure S2: Lack of complementation between *inc I<sup>1</sup>* and *inc I<sup>2</sup>* in *A. majus***

The phenotypes of the *mutabilis* and *incolorata I* mutants are shown with the phenotypes of two of their F<sub>1</sub> progeny.

Supporting Figure S3:

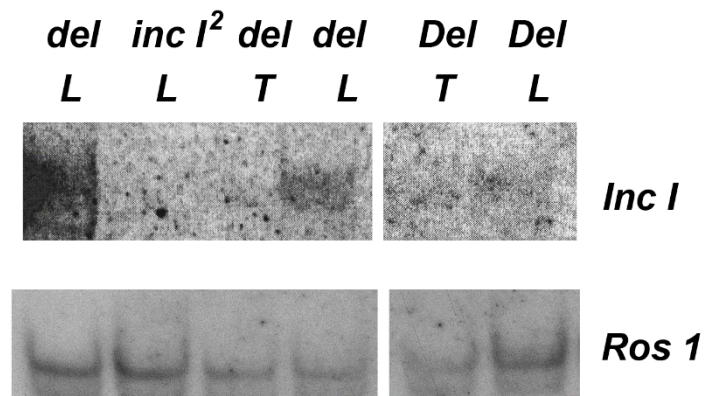

**Supporting Figure S3: RNA gel blot showing lack of *Inc I* transcript in flowers of the *mutabilis* mutant of *A. majus***

Total RNA from flower lobes (L) from the *inc I<sup>2</sup>* mutant lack *Inc I* transcript compared to total RNA from lobes of *del* mutants. No *Inc I* transcript was detected in flower tubes (T) of the *del* mutant. *Inc I* transcript was detected in lobes of wild type (*Del*) flowers and also faintly in tube tissue from wildtype flowers. Transcript levels of *Ros 1* in the same RNA preparations are shown below as loading controls. The *Inc I* probe was pJAM1494, the *Ros 1* probe was pJAM1450 (Schwinn *et al.*, 2006).

Supporting Figure S4:

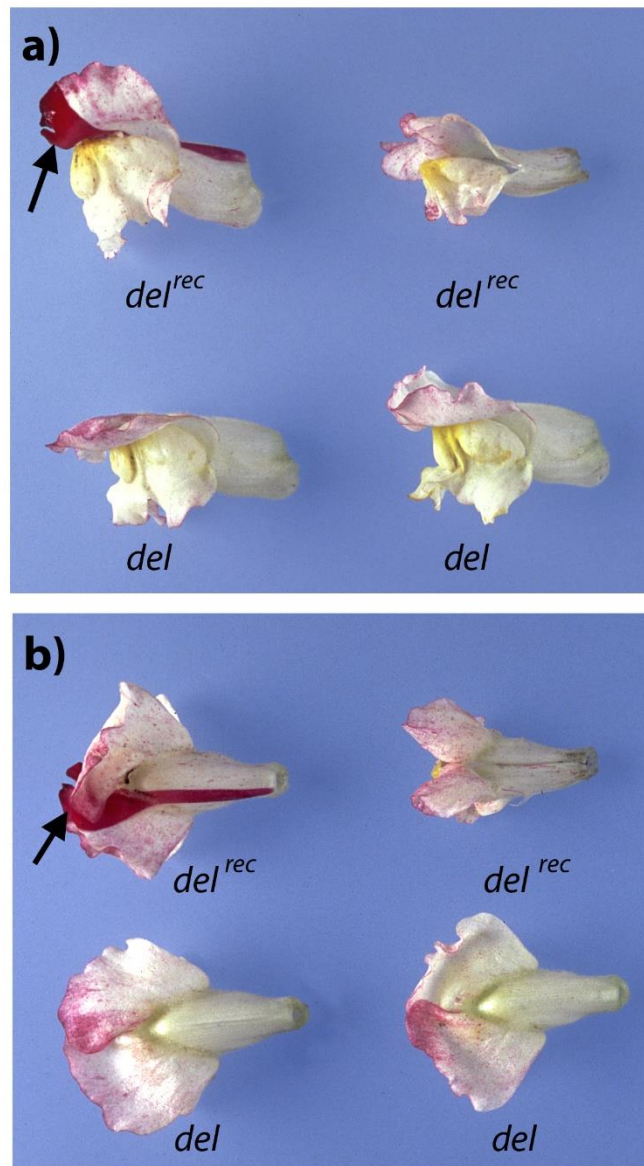

**Supporting Figure S4: Sectors caused by excision of the transposable element (Tam 2) from the *Del* gene in *inc l<sup>2</sup>: del<sup>rec</sup>* *A. majus* plants showing that *Del* activity can complement *Inc I* activity in flower lobes. Arrows point to a *Del<sup>tr</sup>* full red revertant sector that includes both lobe and tube tissue in an *inc l<sup>2</sup>/inc l<sup>2</sup>: del<sup>rec</sup>/del<sup>rec</sup>* mutant line **a)** shows side view of flowers **b)** shows dorsal view of same flowers.**

**Supporting Figure S5:**

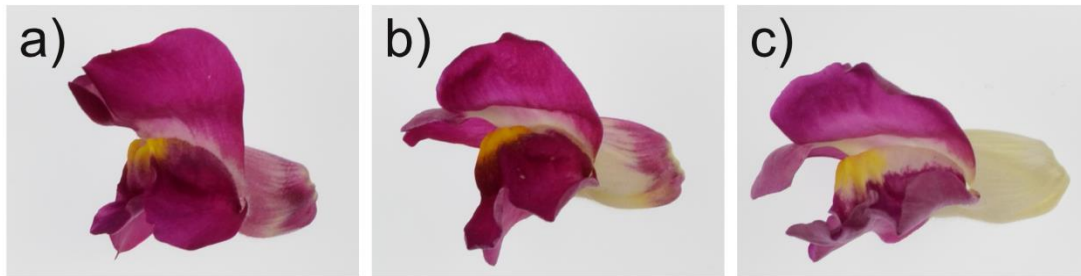

**Supporting Figure S5: Phenotype of *del<sup>23</sup>* allele of *A. majus***

**a)** shows wild type *Del* phenotype **b)** shows *del<sup>23</sup>* phenotype **c)** shows *del* loss-of-function phenotype

Supporting Figure S6:

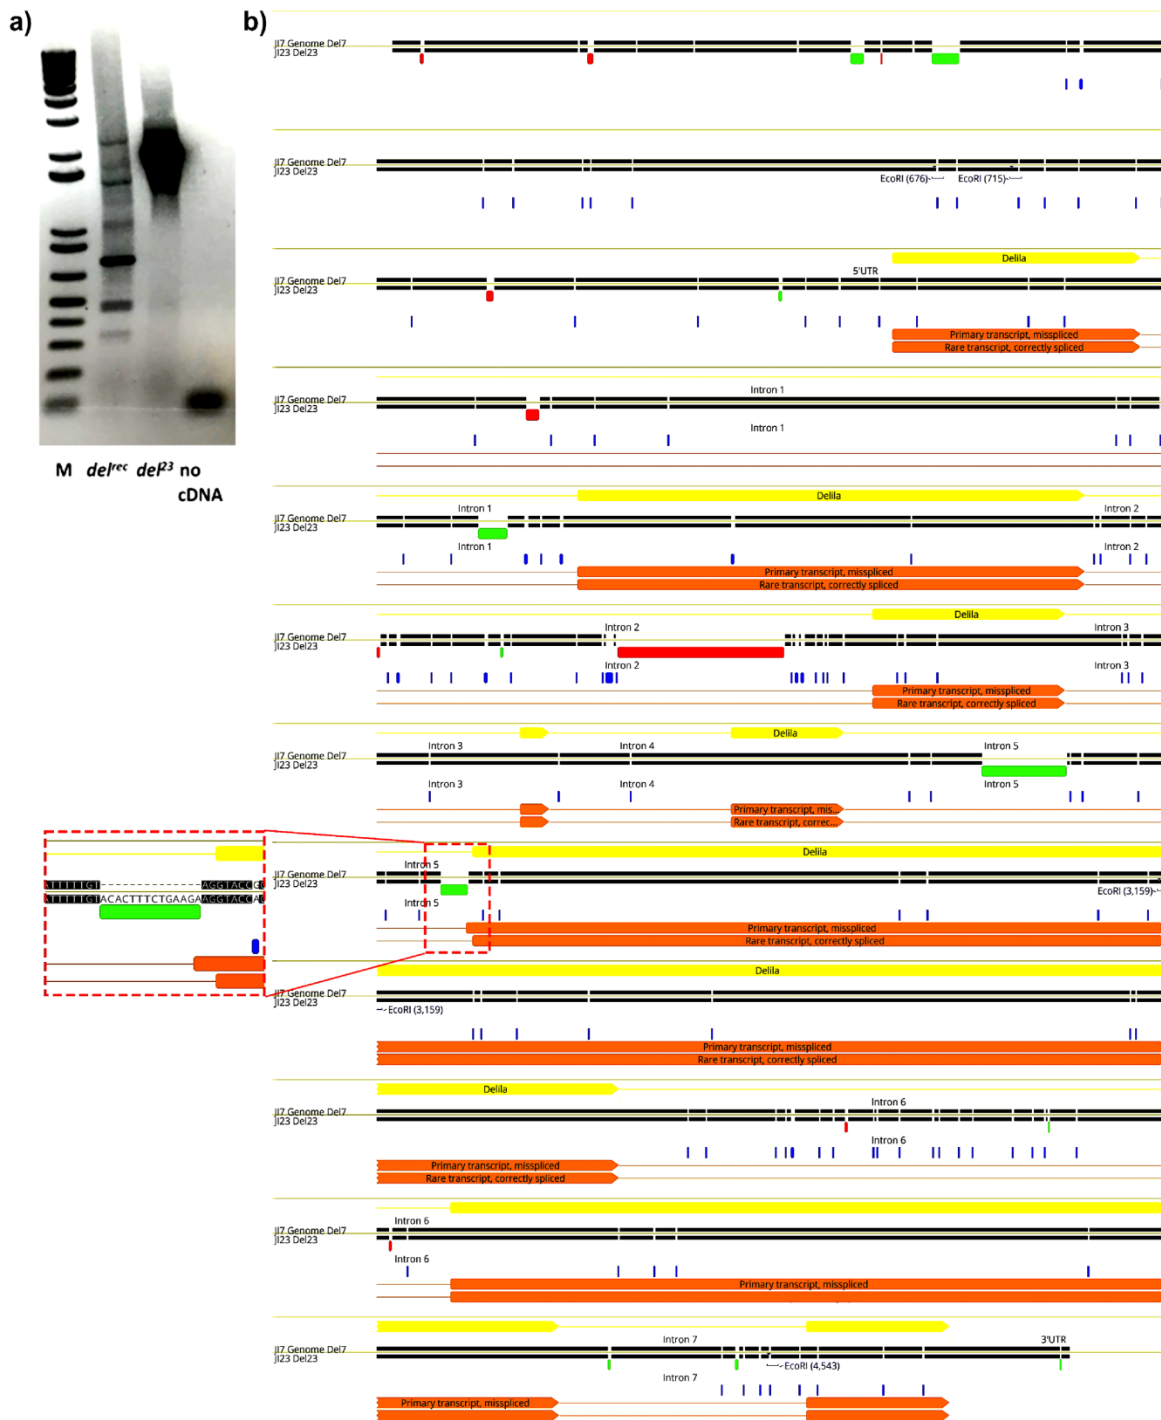

Supporting Figure S6: Molecular analysis of *del<sup>23</sup>* of *A. majus*

a) qRT-PCR amplification of *Del* transcript in flowers of *del<sup>rec</sup>* and *del<sup>23</sup>* lines. b) Nucleotide sequence alignment of the reference genome WT JI:7 (upper sequence) and JI:23 (lower sequence). Annotations of sequence variants relative to the JI:7 reference genome are as follows: single nucleotide polymorphisms are indicated in blue, insertions in green, deletions in red below the aligned genomic sequences. The predominant transcript amplified from JI:23 flowers spliced into an insertion within intron five (see enlarged sequence in dashed-red box), inserting one additional amino acid (indicated by upper transcript shown scarlet bar). Rarely, the *del<sup>23</sup>* transcript spliced correctly (indicated by lower transcript shown as scarlet bar).

Supporting Figure S7:

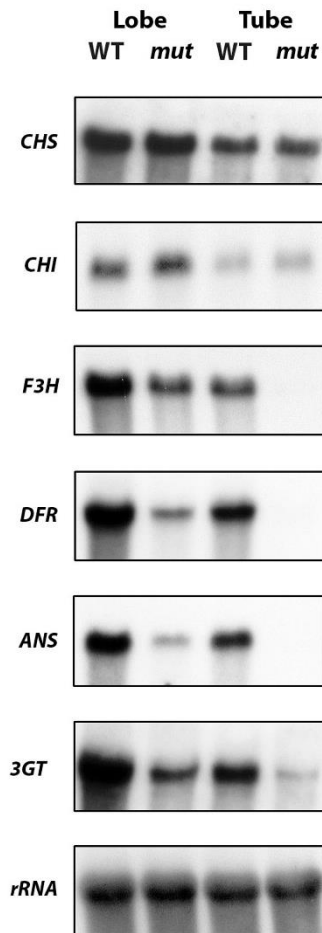

**Supporting Figure S7: Impaired expression of anthocyanin biosynthetic genes in flowers of the *inc l<sup>2</sup>* mutant of *A. majus***

RNA gel blots of total RNA (25 µg) were hybridised with <sup>32</sup>P dCTP-labelled probes for the anthocyanin biosynthetic genes *CHS*, *CHI*, *F3H*, *DFR*, *ANS* and *3GT* or the 26S rRNA (loading control). RNA gel blots showed reduced transcript abundance for the anthocyanin biosynthetic genes *F3H*, *DFR*, *ANS* and *3GT* in the lobes of *inc l<sup>2</sup>* mutants compared with wild-type. This confirmed that the weak pigmentation in *inc l<sup>2</sup>* is because of impaired activation of the anthocyanin biosynthetic genes, and that *Inc l* encodes a regulator of anthocyanin biosynthesis.



Supporting Figure S8

a)

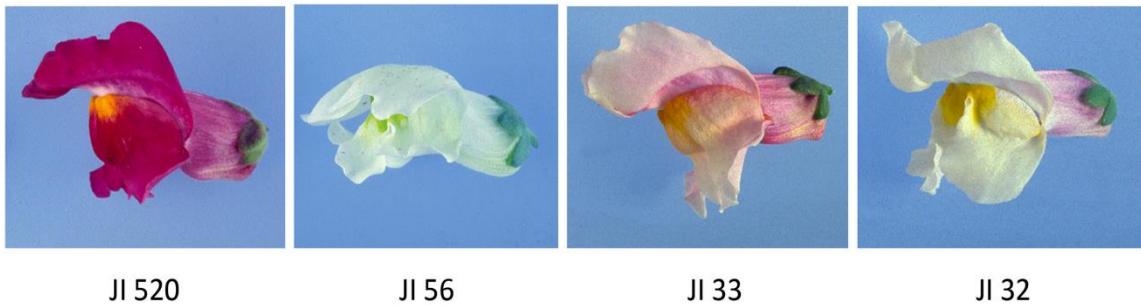

b)

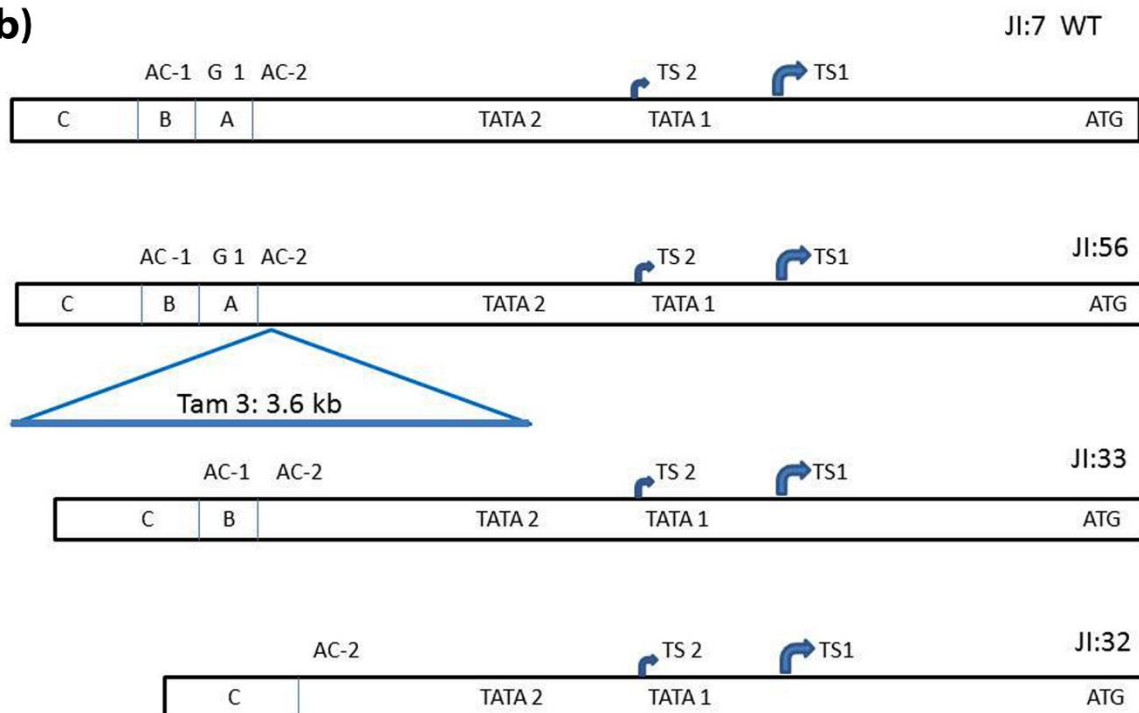

**Supporting Figure S8: Phenotypes of *pallida* mutants of *A. majus* with deletions in their UAS controlling *DFR* expression caused by imprecise transposon excision and described by Almeida *et al* (1989)**

**a)** Phenotypes of *pallida* alleles affected in the structure of the *DFR* promoter in *A. majus*.

**b)** Diagram of the UAS in *DFR* promoter in WT (JI:520) and mutant alleles of the *Pallida* locus encoding *DFR* in *A. majus*. The sequence of the UAS interacting with the MBW complex defined in this study (AC-box 1, G-box 1 and AC-box 2) are shown for each allele as well as the regions of the *DFR* promoter, boxes A, B and C, defined as important for regulation by Almeida *et al.*, (1989). TS1 = transcriptional start site 1, TATA 1 = TATA box associated with TS1, TS2 = transcriptional start site 2 and TATA 2 = TATA box associated with TS2 in *DFR* promoter of *A. majus* (Coen *et al.*, 1986).

# Supporting Dataset S1: Amino acid alignment of bHLH proteins. MUSCLE alignment of bHLH proteins used for Maximum likelihood phylogenetic tree in Figure 2c.

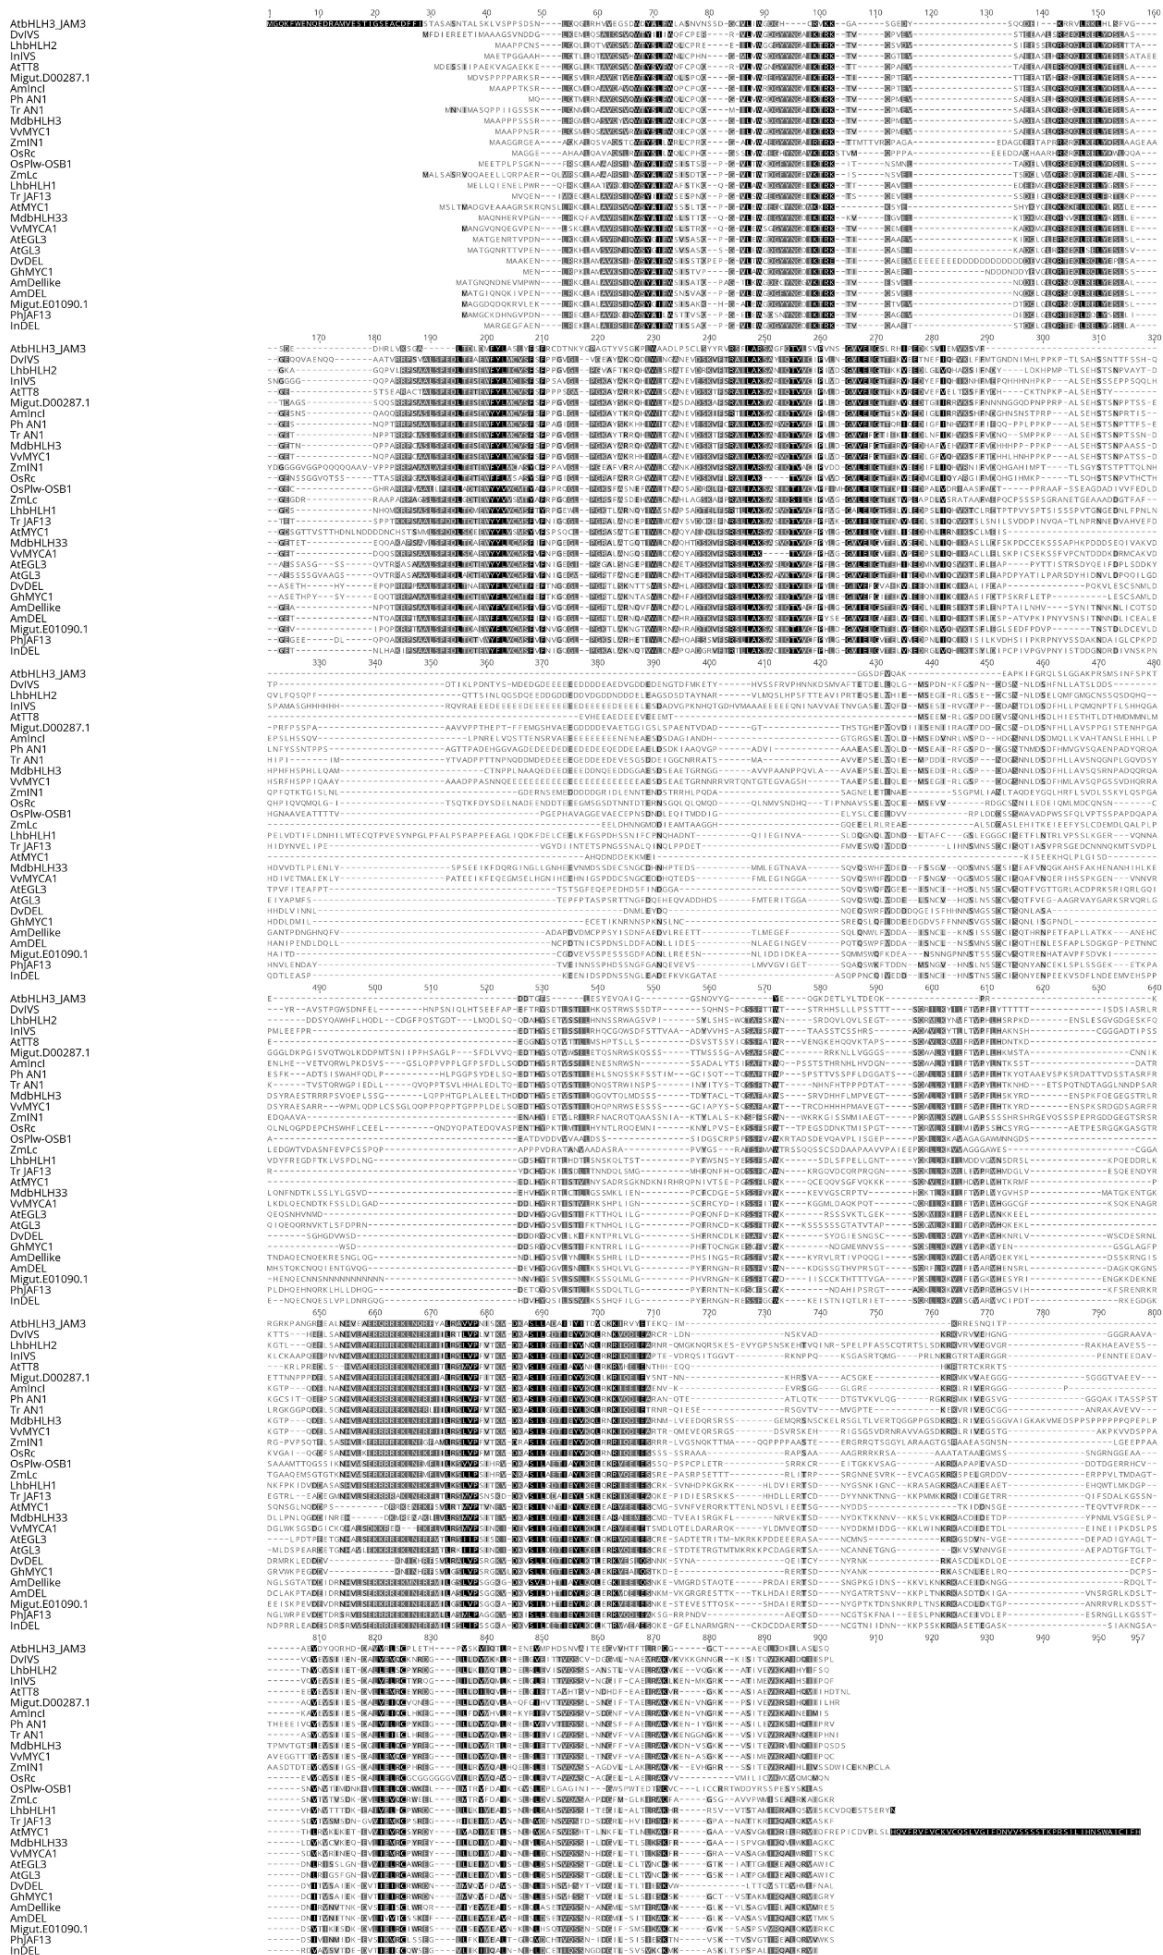

| <b>Supporting Table S1: Primers used in this study</b> |                                                  |                                       |                        |
|--------------------------------------------------------|--------------------------------------------------|---------------------------------------|------------------------|
| <b>Number</b>                                          | <b>Primer</b>                                    | <b>Sequence</b>                       | <b>Application</b>     |
| NA587                                                  | <i>Incolorata</i> / Am02g53780                   | CTAAGAATTCAAGTTGCATCAGGC              | Sequencing             |
| NA588                                                  | <i>Incolorata</i> / Am02g53780                   | AGCCTTAGTTTGGTTCCAGG                  | Sequencing             |
| NA589                                                  | <i>Incolorata</i> / Am02g53780                   | GTGAGATTCACAATAGCTTTGGC               | Sequencing             |
| NA590                                                  | <i>Incolorata</i> / Am02g53780                   | CAAGTCAGAAAATTAGGTGGCG                | Sequencing             |
| NA591                                                  | <i>Incolorata</i> / Am02g53780                   | TGAATGTTCTCTGCACATGCC                 | Sequencing             |
| NA592                                                  | <i>Incolorata</i> / Am02g53780                   | GCGCGAAACCACATGAAGG                   | Sequencing             |
| SM119                                                  | <i>Incolorata</i> / Am02g53780                   | GAGAAGTACTAAAATGGCTGCAC               | Sequencing             |
| SM120                                                  | <i>Incolorata</i> / Am02g53780                   | CTTGGCTCCGCACCTAGTG                   | Sequencing             |
| SM121                                                  | <i>Incolorata</i> / Am02g53780                   | CTAGTGTGGCGTGATGGATATTAC              | Sequencing             |
| SM122                                                  | <i>Incolorata</i> / Am02g53780                   | GCTGTTTGATTCTCCGGCAG                  | Sequencing             |
| SM123                                                  | <i>Incolorata</i> / Am02g53780                   | GTTCGCATAACACTAGTAACCG                | Sequencing             |
| SM124                                                  | <i>Incolorata</i> / Am02g53780                   | CCTTAGCAAGAATTGTCCTGGA                | Sequencing             |
| SM125                                                  | <i>Incolorata</i> / Am02g53780                   | CATCCGAGTCCGACTCAGC                   | Sequencing             |
| SM126                                                  | <i>Incolorata</i> / Am02g53780                   | GTGCTTCCGAATCGTGAAC                   | Sequencing             |
| SM127                                                  | <i>Incolorata</i> / Am02g53780                   | GAGAATAGGTGATTATACGGGACA              | Sequencing             |
| SM128                                                  | <i>Incolorata</i> / Am02g53780                   | CCATGGACAAGTCAGTAGGCC                 | Sequencing             |
| SM129                                                  | <i>Incolorata</i> / Am02g53780                   | CCCGAATTTTGACTAGCCAAATAC              | Sequencing             |
| SM130                                                  | <i>Incolorata</i> / Am02g53780                   | CTCTCTCTCAGCCCTGAAAGC                 | Sequencing             |
| SM131                                                  | <i>Incolorata</i> / Am02g53780                   | CACTGAACAGCTTGAACCGC                  | Sequencing             |
| SM132                                                  | <i>Incolorata</i> / Am02g53780                   | AGGCTGTAAGTCCACTGAACAG                | Sequencing             |
| SM133                                                  | <i>Incolorata</i> / Am02g53780                   | GTTAATCACTCGGTTCAATTCATTAG            | Sequencing             |
| SM134                                                  | <i>Incolorata</i> / Am02g53780                   | TGGCATGGTTGAAGCAAGAC                  | Sequencing             |
| SM135                                                  | <i>Incolorata</i> / Am02g53780                   | CTTACTTGTATTCCAGCACTCTTG              | Sequencing             |
| SM136                                                  | <i>Incolorata</i> / Am02g53780                   | CACACAAAAGGGGTGGAGGAG                 | Sequencing             |
| SM137                                                  | <i>Incolorata</i> / Am02g53780                   | GGTGAAGGAGAATGTGAATGGTAG              | Sequencing             |
| SM138                                                  | <i>Incolorata</i> / Am02g53780                   | TTAGACTGAGAAGCCGGAGC                  | Sequencing             |
|                                                        |                                                  |                                       |                        |
| NA560                                                  | <i>Delila</i> ( <i>del</i> <sup>23</sup> allele) | CACCaaaATGGCTACTGGTGTCCAAAAC          | Cloning/<br>Sequencing |
| NA561                                                  | <i>Delila</i> ( <i>del</i> <sup>23</sup> allele) | TCAAGACTTCATAATAACTTTCTGAAGAG         | Cloning/<br>Sequencing |
|                                                        |                                                  |                                       |                        |
| SM112                                                  | <i>Delila</i> Am02g33340                         | GGATTCAAGAATGGCTACTGGT                | Sequencing             |
| SM113                                                  | <i>Delila</i> Am02g33340                         | AGCCCTGCAAATTAAGTAGCAA                | Sequencing             |
| SM114                                                  | <i>Delila</i> Am02g33340                         | GGTGATGGGTTCTACAATGGAG                | Sequencing             |
| SM115                                                  | <i>Delila</i> Am02g33340                         | GATTCAATTCGACAGATTGTACAGT             | Sequencing             |
| SM116                                                  | <i>Delila</i> Am02g33340                         | GTGCGGACACCAAAGTTTTTC                 | Sequencing             |
| SM117                                                  | <i>Delila</i> Am02g33340                         | GCTTTTGAATTGTCCAGACACG                | Sequencing             |
| SM118                                                  | <i>Delila</i> Am02g33340                         | GAAACCACGTCTTGTGAGAGAG                | Sequencing             |
|                                                        |                                                  |                                       |                        |
| NA556                                                  | <i>Del-like</i> Am02g28470                       | CACCAAATGGCAACTGGAAACCAAATGATA<br>ATG | Cloning/<br>Sequencing |
| NA559                                                  | <i>Del-like</i> Am02g28470                       | TCAAGACTCCCTCATAACCTTCTGC             | Cloning/<br>Sequencing |
| NA557                                                  | <i>Del-like</i> Am02g28470                       | CTACCGCAATTCTCAACCATGTC               | Sequencing             |

|                    |                                                   |                                      |                           |
|--------------------|---------------------------------------------------|--------------------------------------|---------------------------|
| NA558              | <i>Del-like</i> Am02g28470                        | CGGCCACAACTGATTATGACC                | Sequencing                |
| NA568              | <i>Del-like</i> Am02g28470                        | GGTTGTGTAGCTGAGATGGAC                | Sequencing                |
| NA569              | <i>Del-like</i> Am02g28470                        | GACCTAGTTGAGACACTCGAC                | Sequencing                |
| NA570              | <i>Del-like</i> Am02g28470                        | TGGGCAGATCAGGGAGAC                   | Sequencing                |
| NA571              | <i>Del-like</i> Am02g28470                        | ATCGATTTGTGTGTGTGGAAC                | Sequencing                |
|                    |                                                   |                                      |                           |
| K112               | <i>WDR1</i>                                       | ATHGAYACIACITGYACIATHHTGGGA          | 3'RACE                    |
| K113               | <i>WDR1</i>                                       | TGGAAYAARCARGAYYTIMGITAYATGGC        | 3'RACE                    |
| (dT)17-<br>adaptor | cDNA synthesis for 3'RACE<br>Frohman et al., 1988 | GACTCGAGTCGACATCGATTTTTTTTTTTTTTTTTT | 3'RACE                    |
| adaptor            | Adapter primer for 3'RACE<br>Frohman et al., 1988 | GACTCGAGCGACATCGAT                   | 3'RACE                    |
| K127               | <i>WDR1</i>                                       | GCACCAAACATCGACATGGGAACAATC          | Gene walking              |
| K128               | <i>WDR1</i>                                       | AGCAACCGTCGGCAGTTCCCACAGCAA          | Gene walking              |
| K133               | <i>WDR1</i>                                       | tgcaGGTACCAATGGACATTTCAACCCAC        | Cloning cDNA              |
| K134               | <i>WDR1</i>                                       | tcgaTCTAGAGAGAGCTAAAGCCGTCGAC        | Cloning cDNA              |
|                    |                                                   |                                      |                           |
| K564               | <i>Am EF1a</i> Am01g17900                         | GACTGCCACACCTCCCACATTG               | qPCR                      |
| K565               | <i>Am EF1a</i> Am01g17900                         | TCACCATAACCAGCGTCACCATTC             | qPCR                      |
| K566               | <i>Am Cyclophilin</i><br>Am05g43400               | CCAGGGCGGCGATTTCCACC                 | qPCR                      |
| K567               | <i>Am Cyclophilin</i><br>Am05g43400               | GCGTTCGCCATGGACAGGATTC               | qPCR                      |
| K488               | <i>Nivea/CHS</i> Am04g40840                       | TGCTGCGTATGGCGAAGGACT                | qPCR                      |
| K489               | <i>Nivea/CHS</i> Am04g40840                       | CCGCGGTAACGATCTGGAAAA                | qPCR                      |
| K461               | <i>Pallida/DFR</i> Am06g29640                     | CACATCAATGGACAAGAGAATGC              | qPCR                      |
| K462               | <i>Pallida/DFR</i> Am06g29640                     | GCCATCAGTATGATCGTTTGC                | qPCR                      |
| NA621              | <i>Candi/ANS</i> Am02g33790                       | GGTTGAGGAGAAGGAGAAGC                 | qPCR                      |
| NA622              | <i>Candi/ANS</i> Am02g33790                       | CCACTCCAGTTGACCACTAG                 | qPCR                      |
| NA623              | 3-O-UFGT Am02g24600                               | TGAGAGTGTTATGGTCGTGG                 | qPCR                      |
| NA624              | 3-O-UFGT Am02g24600                               | CTCCTGAACTCCCTTATCACC                | qPCR                      |
| NA625              | CHI Am02g23710                                    | CTGCGATCACCCAAATTCAG                 | qPCR                      |
| NA626              | CHI Am02g23710                                    | ACTTGATGAACTTCCCCTGG                 | qPCR                      |
| NA631              | <i>Inc II/F3H</i> Am05g03330                      | TACTTTGCTGCTCCAGGATC                 | qPCR                      |
| NA632              | <i>Inc II/F3H</i> Am05g03330                      | GAGTTCACAACCTGCTTGGTG                | qPCR                      |
| K562               | <i>Rosea1</i> Am06g36450                          | AGGATGGGGAATTAGGAAACCTA              | qPCR                      |
| K563               | <i>Rosea1</i> Am06g36450                          | CTCTCCATAACATCAGTAATCTC              | qPCR                      |
| K297               | <i>WDR1</i> Am01g20780                            | TGGGCGCCGCACAGTTG                    | qPCR                      |
| K299               | <i>WDR1</i> Am01g20780                            | GCTAAAGCCGTCGACTACCTCACA             | qPCR                      |
| SM13               | <i>Incolorata I</i> Am02g53780                    | CCTCGTGCCGTTTGTACTA                  | qPCR                      |
| SM14               | <i>Incolorata I</i> Am02g53780                    | CTCGAGCTCCTCAATCTTCTTC               | qPCR                      |
| SM15               | <i>Delila</i> Am02g33340                          | ATTCTTGCATCCCTAGTCCCATCC             | qPCR                      |
| SM16               | <i>Delila</i> Am02g33340                          | CCCCCGGCCCTTACCATTTT                 | qPCR                      |
| NA562              | <i>Del-like</i> Am02g28470                        | TGTGGAGGCAAAGAGTGATTTA               | qPCR                      |
| NA563              | <i>Del-like</i> Am02g28470                        | CCCTTCCACTTGGCTCTTATAG               | qPCR                      |
|                    |                                                   |                                      |                           |
| EB-665             | <i>Pallida/DFR</i> promoter<br>Am06g29640         | GTTATCACGTGCCTCGCGA                  | Deletion for<br>p2551 and |

|        |                                            |                                |                                    |
|--------|--------------------------------------------|--------------------------------|------------------------------------|
|        |                                            |                                | p2552                              |
| EB-666 | <i>Pallida</i> /DFR promoter<br>Am06g29640 | TTTAGGAAGGTGATAGTATTACGTACT    | Deletion for<br>p2551 and<br>p2565 |
| EB-668 | <i>Pallida</i> /DFR promoter<br>Am06g29640 | GTATAAACTATGCCACTTCTATGACA     | Deletion for<br>p2552              |
| EB-672 | <i>Pallida</i> /DFR promoter<br>Am06g29640 | TTTATATAGTACGTAATACTATCACCTTC  | Deletion for<br>p2557              |
| EB-674 | <i>Pallida</i> /DFR promoter<br>Am06g29640 | AAGCTTATTCAAAAATCGTATAGAAATTCA | Deletion for<br>p2557              |
| EB-697 | <i>Pallida</i> /DFR promoter<br>Am06g29640 | GTCTTGAAAGTTAGGAGAATTCGT       | Deletion for<br>p2565 and<br>p2571 |
| EB-719 | <i>Pallida</i> /DFR promoter               | AGGCACGTGATAACCCTACCA          | Deletion for<br>p2571              |

## Supplementary references:

- Almeida J, Carpenter R, Robbins TP, Martin C, Coen ES. 1989.** Genetic interactions underlying flower color patterns in *Antirrhinum majus*. *Genes & Development* **3**(11): 1758-1767.
- Coen ES, Carpenter R, Martin C. 1986.** Transposable elements generate novel spatial patterns of gene-expression in *Antirrhinum majus*. *Cell* **47**(2): 285-296.
- Schwinn K, Venail J, Shang Y, Mackay S, Alm V, Butelli E, Oyama R, Bailey P, Davies K, Martin C. 2006.** A small family of MYB-regulatory genes controls floral pigmentation intensity and patterning in the genus *Antirrhinum*. *Plant Cell* **18**(4): 831-851.
